# Supplementary material for: Direct demonstration of triplet excimer in purely organic room temperature phosphorescence through rational molecular design
Source: PubMed Central journal article supplement (PMC9114335; doi:10.1038/s41377-022-00826-4), 2022-05-17
Supplement: 41377_2022_826_MOESM1_ESM.pdf [file 41377_2022_826_MOESM1_ESM.pdf]

## **Supplementary Information for**

# **Direct demonstration of triplet excimer in purely organic room temperature phosphorescence through rational molecular design**

Zhenjiang Liu<sup>1</sup>, Yu Tian<sup>1</sup>, Jie Yang<sup>1\*</sup>, Aisen Li<sup>5</sup>, Yunsheng Wang<sup>1</sup>, Jia Ren<sup>1</sup>, Manman Fang<sup>1</sup>,  
Ben Zhong Tang<sup>1,3\*</sup>, Zhen Li<sup>1,2,4,5,6\*</sup>

<sup>1</sup> Institute of Molecular Aggregation Science, Tianjin University, Tianjin, 300072, China.

<sup>2</sup> Tianjin Key Laboratory of Molecular Optoelectronic Sciences, Department of Chemistry, Tianjin University, Tianjin, 300072, China.

<sup>3</sup> Shenzhen Institute of Molecular Aggregate Science and Engineering, School of Science and Engineering, The Chinese University of Hong Kong, Shenzhen, Guangdong, 518172, China.

<sup>4</sup> Department of Chemistry, Wuhan University, Wuhan, 430072, China.

<sup>5</sup> Joint School of National University of Singapore, Tianjin University, International Campus of Tianjin University, Binhai New City, Fuzhou, 350207, China.

<sup>6</sup> Wuhan National Laboratory for Optoelectronics, Huazhong University of Science and Technology, Wuhan 430074, China.

**This PDF file includes:**

**Chart S1** Molecular structures and the packing modes in dimer of the reported persistent RTP materials.

**Scheme S1** The synthetic route of **2PtzO-nC**.

**Fig. S1** High performance liquid chromatography diagrams of **2PtzO-nC**.

**Fig. S2 a** Thermo-gravimetric Analysis (TGA) curves. **b** Differential scanning calorimeter (DSC) curves of **2PtzO-nC**.

**Table S1** Photophysical data of **2PtzO-nC** (n = 3-6) in solutions and crystals.

**Table S2** Photophysical data of **2PtzO-nC** (n = 7-10) in solutions and crystals.

**Fig. S3 a** The UV-vis absorption spectra of **2PtzO-nC** in the dilute DCM solution (10  $\mu$ M) and **(b)** in solid state.

**Fig. S4 a** The steady-state PL spectra of **2PtzO-nC** in dilute DCM solution (10  $\mu$ M) at room temperature and **b**) at 77K ( $\lambda_{\text{ex}} = 330$  nm). **c** The phosphorescence spectra of **2PtzO-nC** in dilute DCM solution (10  $\mu$ M) at 77K ( $\lambda_{\text{ex}} = 330$  nm). **d** The phosphorescence-decay curves of **2PtzO-nC** in dilute DCM solution (10  $\mu$ M) at 77K ( $\lambda_{\text{ex}} = 330$  nm).

**Fig. S5 a** The phosphorescence spectra of **2PtzO-nC** doped in polymethyl methacrylate (PMMA) matrix with mass ratio of 1% at room temperature ( $\lambda_{\text{ex}} = 365$  nm); **b** The phosphorescence spectra of **2PtzO-nC** doped in polymethyl methacrylate (PMMA) matrix with mass ratio of 1% at 77K ( $\lambda_{\text{ex}} = 330$  nm). **c** Time-resolved phosphorescence-decay curves of **2PtzO-nC** in polymethyl methacrylate (PMMA) matrix at 77K (@ 405 nm;  $\lambda_{\text{ex}} = 330$  nm).

**Fig. S6 a** The steady-state PL spectra of **2PtzO-nC** in crystal state at room temperature ( $\lambda_{\text{ex}} = 330$  nm). **b** PL decay curves of **2PtzO-nC** (n = 3-6) in crystal state ( $\lambda_{\text{ex}} = 330$  nm; monomer fluorescence). **c** PL decay curves of **2PtzO-nC** (n = 7-10) in crystal state ( $\lambda_{\text{ex}} = 330$  nm; monomer fluorescence).

**Fig. S7 a** The excitation spectra of **2PtzO-nC** in crystal state for the phosphorescence band at 445 nm and **b** at 500 nm.

**Fig. S8 a** Time-resolved RTP-decay curves of **2PtzO-nC** crystals at 445 nm ( $\lambda_{\text{ex}} = 365$  nm; monomer phosphorescence). **b** Time-resolved RTP-decay curves of **2PtzO-nC** (n = 3-6) crystals at 500 nm ( $\lambda_{\text{ex}} = 365$  nm; dimer phosphorescence). **c** Time-resolved RTP-decay curves of **2PtzO-nC** (n = 7-10) crystals at 500 nm ( $\lambda_{\text{ex}} = 365$  nm; dimer phosphorescence).

**Fig. S9** Photographs of **2PtzO-nC** crystals taken at different times before and after removing the excitation of a 365 nm UV lamp.

**Fig. S10** Application of multiple anti-counterfeiting.

**Fig. S11** Entire and local packing modes of **2PtzO-3C** and **2PtzO-4C**.

**Fig. S12** Entire and local packing modes of **2PtzO-5C** and **2PtzO-6C**.

**Fig. S13** Entire and local packing modes of **2PtzO-7C** and **2PtzO-8C**.

**Fig. S14** Entire and local packing modes of **2PtzO-9C** and **2PtzO-10C**.

**Table S3** Structure data of single crystals of **2PtzO-nC** (n = 3-6).

**Table S4** Structure data of single crystals of **2PtzO-nC** (n = 7-10).

**Fig. S15** Natural transition orbitals (NTOs) of the  $T_1$  state for the dimers of **2PtzO-3C** and **2PtzO-4C**.

**Fig. S16** Natural transition orbitals (NTOs) of  $T_1$  state for the dimers of **2PtzO-5C** and **2PtzO-6C**.

**Fig. S17** Natural transition orbitals (NTOs) of  $T_1$  state for the dimers of **2PtzO-7C** and **2PtzO-8C**.

**Fig. S18** Natural transition orbitals (NTOs) of  $T_1$  state for the dimers of **2PtzO-9C** and **2PtzO-10C**.

**Fig. S19** The HOMO, LUMO orbital distributions for the dimer unit of **2PtzO-3C**.

**Fig. S20** The HOMO, LUMO orbital distributions for the dimer unit of **2PtzO-4C**.

**Fig. S21** The HOMO, LUMO orbital distributions for the dimer unit of **2PtzO-5C**.

**Fig. S22** The HOMO, LUMO orbital distributions for the dimer unit of **2PtzO-6C**.

**Fig. S23** The HOMO, LUMO orbital distributions for the dimer unit of **2PtzO-7C**.

**Fig. S24** The HOMO, LUMO orbital distributions for the dimer unit of **2PtzO-8C**.

**Fig. S25** The HOMO, LUMO orbital distributions for the dimer units of **2PtzO-9C**.

**Fig. S26** The HOMO, LUMO orbital distributions for the dimer unit of **2PtzO-10C**.

**Fig. S27** The PL spectra of **2PtzO-nC** ( $n = 3-6$ ) crystals at different temperatures.

**Fig. S28** The PL spectra of **2PtzO-nC** ( $n = 7-10$ ) crystals at different temperatures.

**Fig. S39** The normalized phosphorescence spectra of **2PtzO-nC** ( $n = 3-6$ ) crystals at room temperature and 77 K.

**Fig. S30** The normalized phosphorescence spectra of **2PtzO-nC** ( $n = 7-10$ ) crystals at room temperature and 77 K.

**Fig. S31 a** Time-resolved PL-decay curves for monomer phosphorescence (@445 nm) of **2PtzO-nC** crystals at 77 K. **b** Time-resolved PL-decay curves for dimer phosphorescence (@500 nm) of **2PtzO-nC** crystals at 77 K.

**Table S5** The phosphorescence intensity and ratio of dimer to monomer for **2PtzO-nC** ( $n = 3-6$ ) crystals at 77 K and room temperature.

**Table S6** The phosphorescence intensity and ratio of dimer to monomer for **2PtzO-nC** ( $n = 7-10$ ) crystals at 77 K and room temperature.

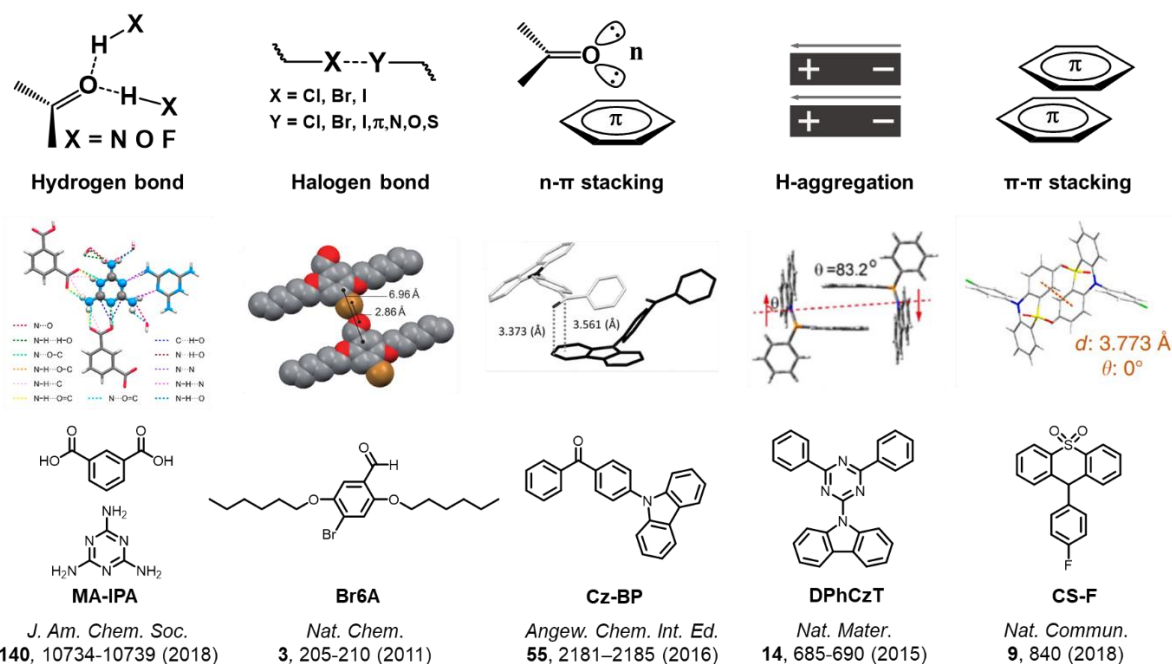

**Chart S1** Molecular structures and the packing modes in dimer of the reported persistent RTP materials. **MA-IPA** aggregates containing intermolecular hydrogen bonds achieve an ultralong emission lifetime of up to 1.91 s and a high phosphorescence quantum efficiency of 24.3%. Halogen bonding in **Br6A** crystal can be made to direct the heavy atom effect to produce high phosphorescent quantum yields of up to 2.9%. RTP with lifetime of 0.49 s resulting from intermolecular electronic coupling was obtained in **Cz-BP** crystal. Yellow-green phosphorescence lifetime up to 1.05 s was achieved by effective stabilization of triplet excited states through strong coupling in **DPhCzT** crystal with H-aggregation. Strong  $\pi$ - $\pi$  interactions in **CS-F** crystal can also promote the RTP lifetime. Copyright 2018 American Chemistry Society, 2011 Nature Publishing Group, 2016 Wiley-VCH, 2015 Nature Publishing Group, 2018 Nature Publishing Group.

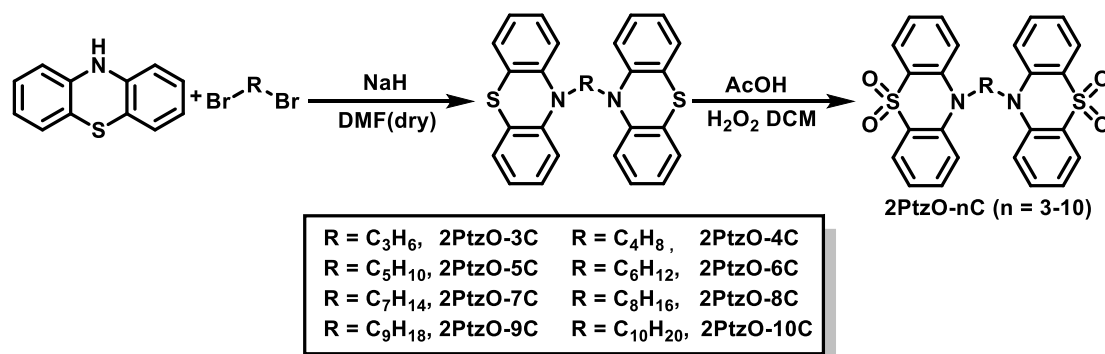

**Scheme S1** The synthetic route of **2PtzO-nC**.



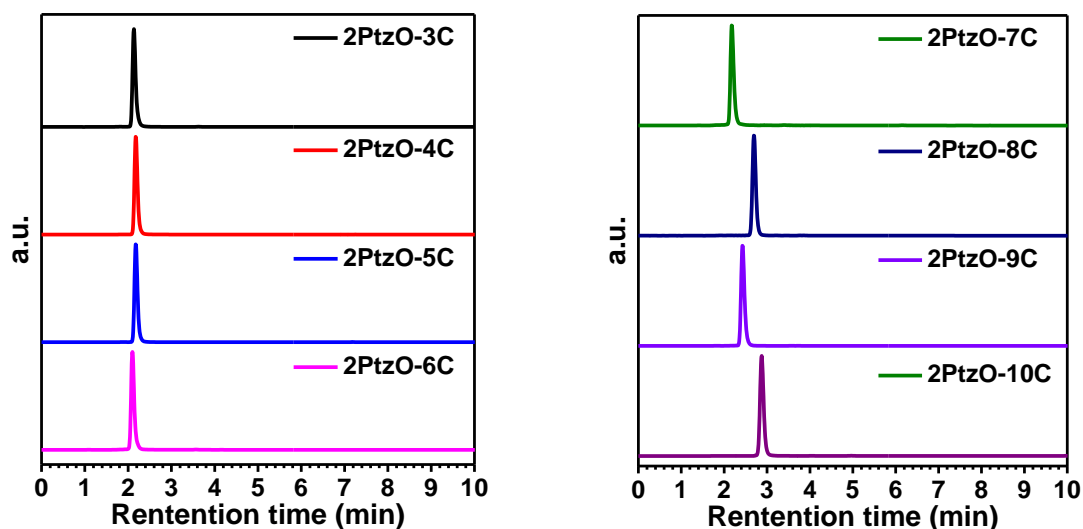

**Fig. S1** High performance liquid chromatography diagrams of **2PtzO-nC**.

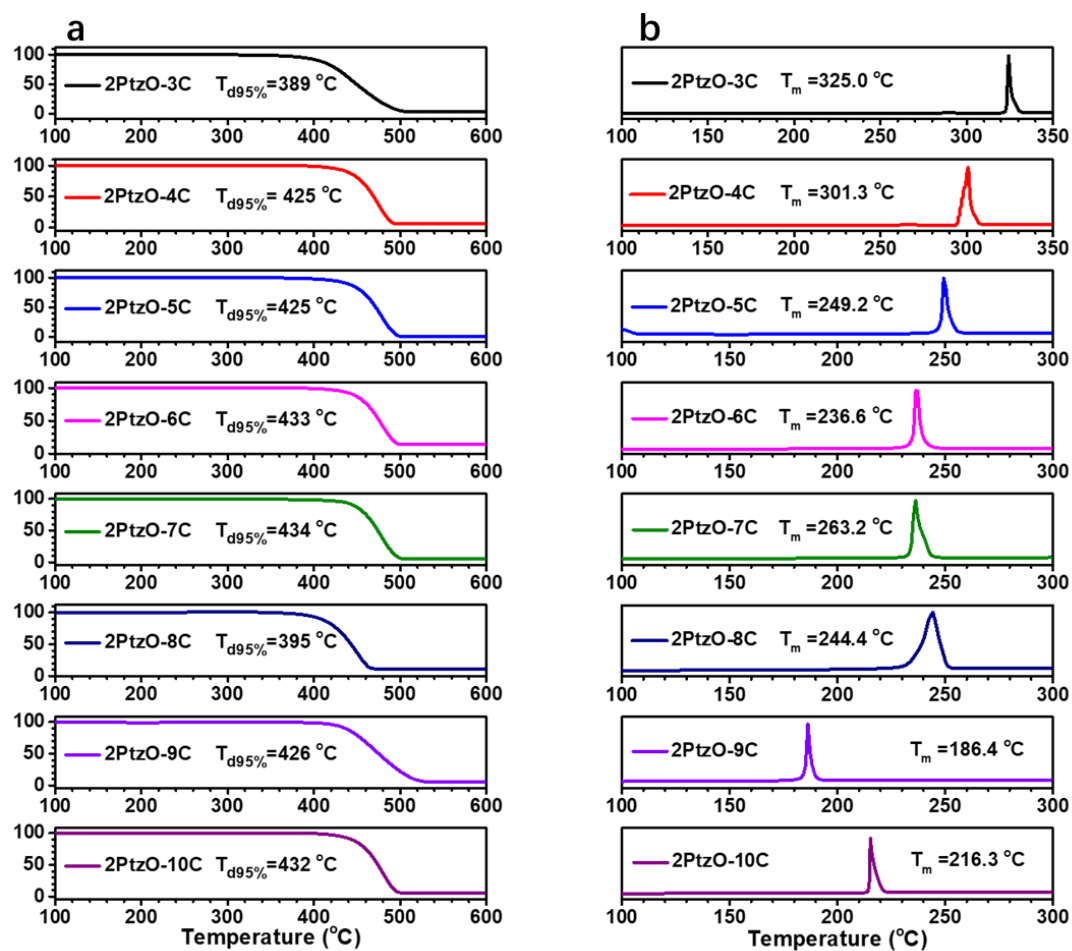

**Fig. S2 a** Thermo-gravimetric Analysis (TGA) curves. **b** Differential scanning calorimetry (DSC) curves of **2PtzO-nC**.

**Table S1** Photophysical data of **2PtzO-nC** (n = 3-6) in solutions and crystals.

| compound                               | 2PtzO-3C       | 2PtzO-4C     | 2PtzO-5C      | 2PtzO-6C     |
|----------------------------------------|----------------|--------------|---------------|--------------|
| $\lambda_{\text{abs}}^{\text{a}}$ (nm) | 334            | 335          | 337           | 337          |
| $\lambda_{\text{abs}}^{\text{b}}$ (nm) | 337            | 337          | 340           | 338          |
| $\lambda_{\text{F}}^{\text{c}}$ (nm)   | 361            | 362          | 364           | 368          |
| $\lambda_{\text{P}}^{\text{c}}$ (nm)   | 400            | 409          | 406           | 404          |
| $\tau_{\text{P}}^{\text{c}}$ (ms)      | 376.5          | 488.3        | 451.1         | 383.0        |
| $\lambda_{\text{P}}^{\text{d}}$ (nm)   | 448, 491       | 448, 484     | 471           | 461          |
| $\tau_{\text{P}}^{\text{d}}$ (ms)      | 1292.9, 1465.4 | 605.8, 593.3 | 1618.2, 672.9 | 449.6, 765.6 |
| $\lambda_{\text{F}}^{\text{e}}$ (nm)   | 384            | 385          | 380           | 384          |
| $\tau_{\text{F}}^{\text{e}}$ (ns)      | 1.06           | 1.06         | 1.02          | 1.04         |
| $\lambda_{\text{P}}^{\text{e}}$ (nm)   | 493            | 441, 502     | 444, 512      | 445, 503     |
| $\tau_{\text{P}}^{\text{e}}$ (ms)      | 59.8           | 119.9, 78.6  | 107.3, 156.7  | 142.8, 256.1 |
| $\Phi_{\text{PL}}^{\text{e}}$ (%)      | 6.32           | 3.96         | 6.58          | 3.69         |
| $\lambda_{\text{P}}^{\text{f}}$ (nm)   | 404            | 405          | 405           | 404          |
| $\tau_{\text{P}}^{\text{f}}$ (ms)      | 363.0          | 359.6        | 364.8         | 375.0        |

<sup>a</sup> Observed from absorption spectra in dilute dichloromethane solution.

<sup>b</sup> Observed from absorption spectra in solid powder state.

<sup>c</sup> Determined in dilute dichloromethane solution at 77K.

<sup>d</sup> Determined in crystal state at 77K.

<sup>e</sup> Determined in crystal state at room temperature.

<sup>f</sup> Determined in PMMA film at 77K.

\* The left of  $\tau_{\text{P}}^{\text{d}}$  is the phosphorescence lifetime at 445 nm and the right is at 500 nm.

**Table S2** Photophysical data of **2PtzO-nC** (n = 7-10) in solutions and crystals.

| <b>compound</b>                        | <b>2PtzO-7C</b> | <b>2PtzO-8C</b> | <b>2PtzO-9C</b> | <b>2PtzO-10C</b> |
|----------------------------------------|-----------------|-----------------|-----------------|------------------|
| $\lambda_{\text{abs}}^{\text{a}}$ (nm) | 338             | 337             | 337             | 337              |
| $\lambda_{\text{abs}}^{\text{b}}$ (nm) | 339             | 338             | 340             | 339              |
| $\lambda_{\text{F}}^{\text{c}}$ (nm)   | 364             | 367             | 364             | 362              |
| $\lambda_{\text{P}}^{\text{c}}$ (nm)   | 406             | 406             | 405             | 405              |
| $\tau_{\text{P}}^{\text{c}}$ (ms)      | 320.5           | 360.0           | 337.1           | 351.6            |
| $\lambda_{\text{P}}^{\text{d}}$ (nm)   | 443, 494        | 448, 486        | 456             | 443, 489         |
| $\tau_{\text{P}}^{\text{d}}$ (ms)      | 2163.2, 2128.5  | 314.6, 318.4    | 1696.9, 1596.5  | 1435.5, 1239.8   |
| $\lambda_{\text{F}}^{\text{e}}$ (nm)   | 378             | 378             | 376             | 380              |
| $\tau_{\text{F}}^{\text{e}}$ (ns)      | 0.88            | 0.95            | 0.94            | 0.93             |
| $\lambda_{\text{P}}^{\text{e}}$ (nm)   | 501             | 494             | 437, 509        | 500              |
| $\tau_{\text{P}}^{\text{e}}$ (ms)      | 86.0            | 60.4            | 30.3, 125.7     | 90.8             |
| $\Phi_{\text{PL}}^{\text{e}}$ (%)      | 12.80           | 10.44           | 1.12            | 3.13             |
| $\lambda_{\text{P}}^{\text{f}}$ (nm)   | 406             | 405             | 404             | 404              |
| $\tau_{\text{P}}^{\text{f}}$ (ms)      | 358.1           | 343.1           | 349.6           | 358.4            |

<sup>a</sup> Observed from absorption spectra in dilute dichloromethane solution.

<sup>b</sup> Observed from absorption spectra in solid powder state.

<sup>c</sup> Determined in dilute dichloromethane solution at 77K.

<sup>d</sup> Determined in crystal state at 77K.

<sup>e</sup> Determined in crystal state at room temperature.

\* The left of  $\tau_{\text{P}}^{\text{d}}$  is the phosphorescence lifetime at 445 nm and the right is at 500 nm.

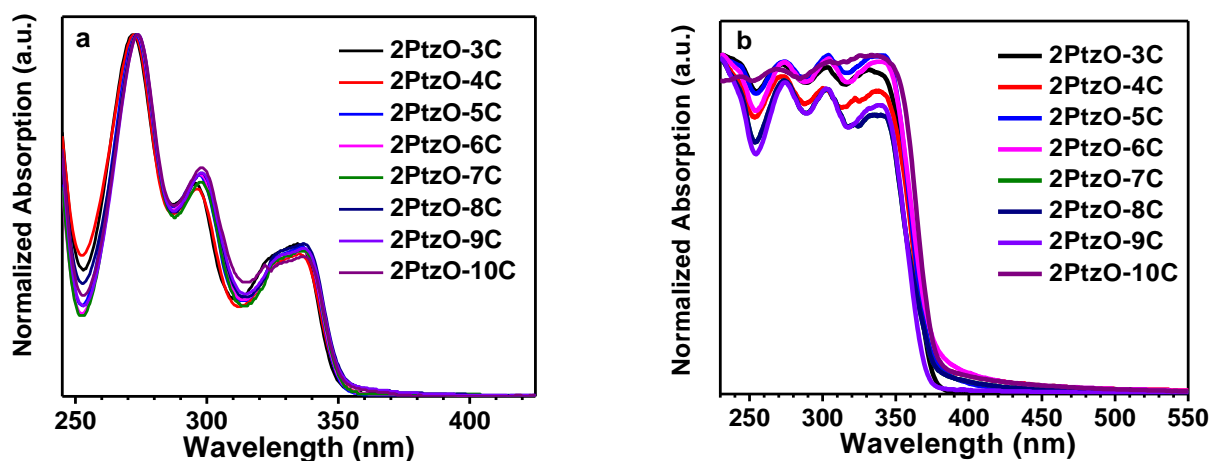

**Fig. S3** **a** The UV-vis absorption spectra of **2PtzO-nC** in the dilute DCM solution (10  $\mu\text{M}$ ) and **(b)** in solid state.

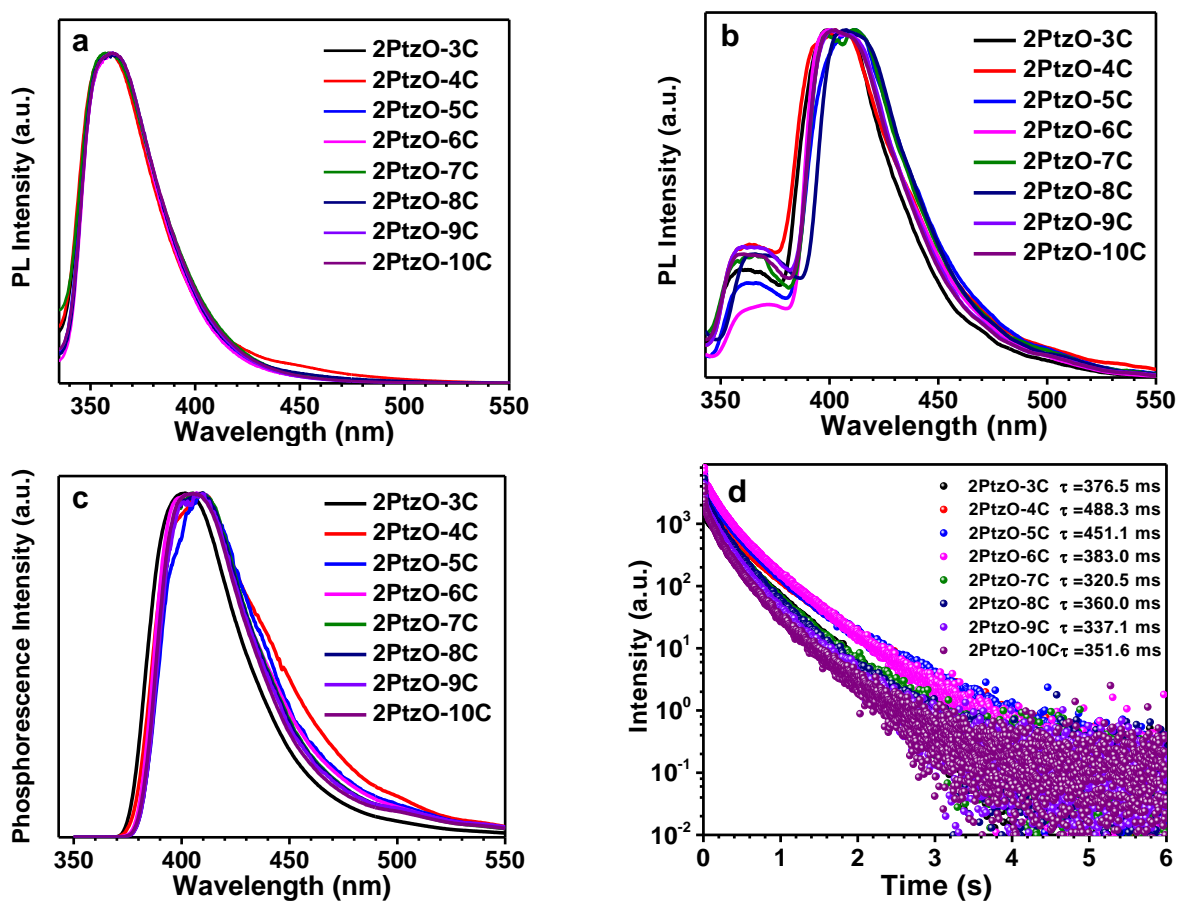

**Fig. S4** **a** The steady-state PL spectra of **2PtzO-nC** in dilute DCM solution (10  $\mu\text{M}$ ) at room temperature and **b**) at 77K ( $\lambda_{\text{ex}} = 330 \text{ nm}$ ). **c** The phosphorescence spectra of **2PtzO-nC** in dilute DCM solution (10  $\mu\text{M}$ ) at 77K ( $\lambda_{\text{ex}} = 330 \text{ nm}$ ). **d** The phosphorescence-decay curves of **2PtzO-nC** in dilute DCM solution (10  $\mu\text{M}$ ) at 77K (@ 405 nm;  $\lambda_{\text{ex}} = 330 \text{ nm}$ ).

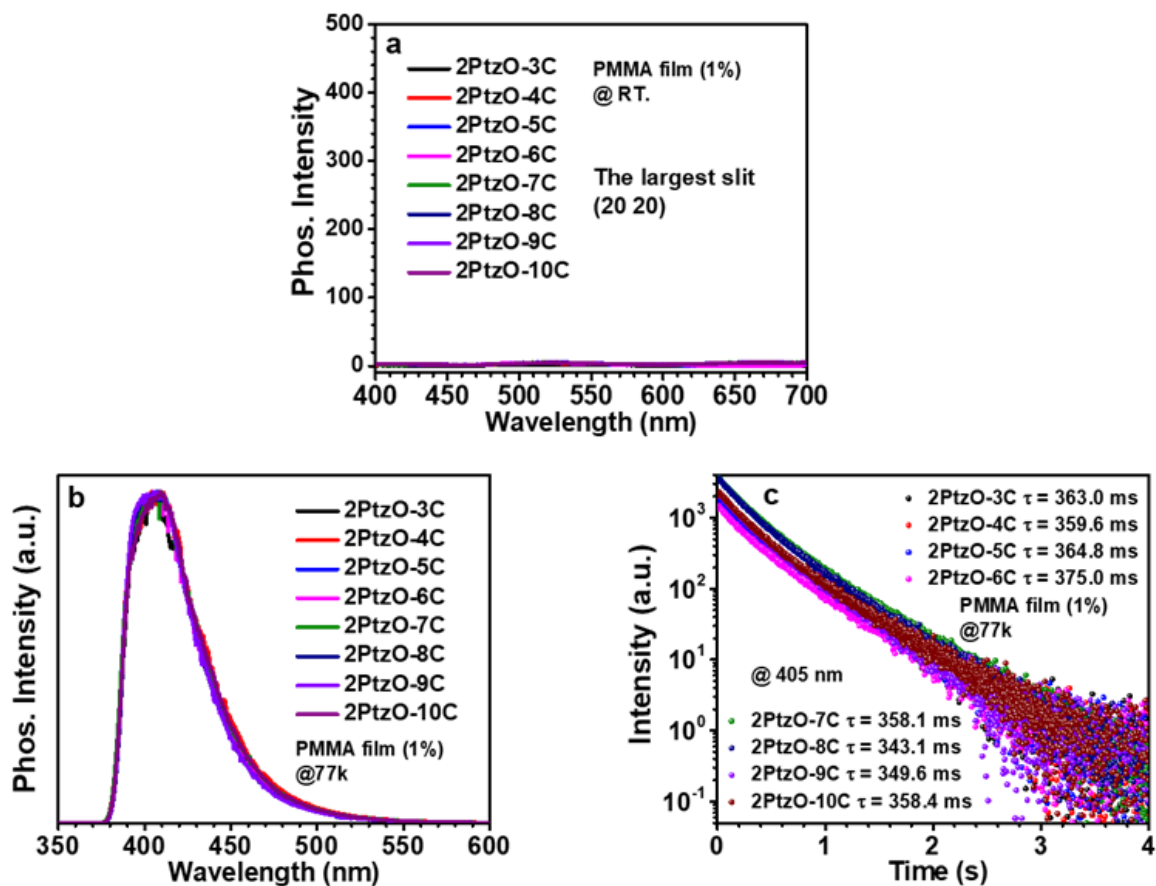

**Fig. S5 a** The phosphorescence spectra of **2PtzO-nC** doped in polymethyl methacrylate (PMMA) matrix with mass ratio of 1% at room temperature ( $\lambda_{\text{ex}} = 365$  nm); **b** The phosphorescence spectra of **2PtzO-nC** doped in polymethyl methacrylate (PMMA) matrix with mass ratio of 1% at 77K ( $\lambda_{\text{ex}} = 330$  nm). **c** Time-resolved phosphorescence-decay curves of **2PtzO-nC** in polymethyl methacrylate (PMMA) matrix at 77K (@ 405 nm;  $\lambda_{\text{ex}} = 330$  nm).

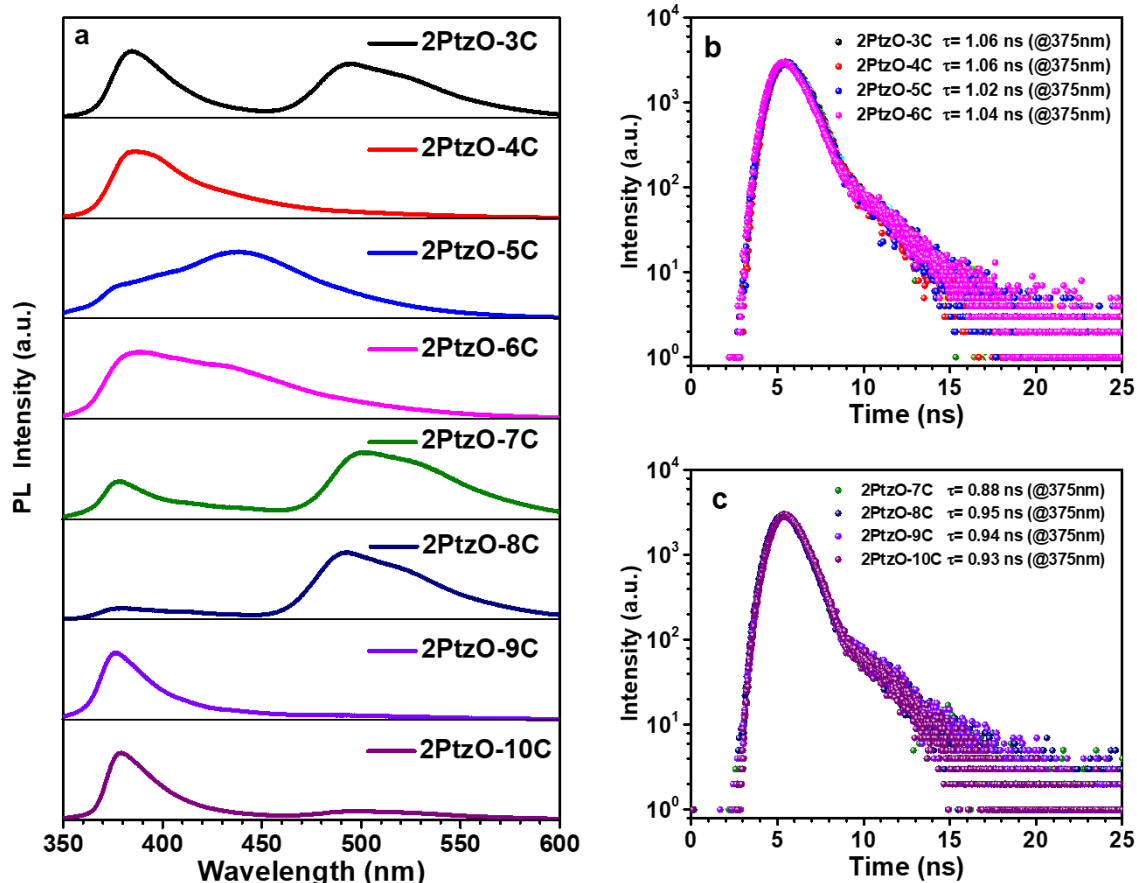

**Fig. S6** **a** The steady-state PL spectra of **2PtzO-nC** in crystal state at room temperature ( $\lambda_{\text{ex}} = 330$  nm). **b** PL decay curves of **2PtzO-nC** ( $n = 3-6$ ) in crystal state ( $\lambda_{\text{ex}} = 330$  nm; monomer fluorescence). **c** PL decay curves of **2PtzO-nC** ( $n = 7-10$ ) in crystal state ( $\lambda_{\text{ex}} = 330$  nm; monomer fluorescence).

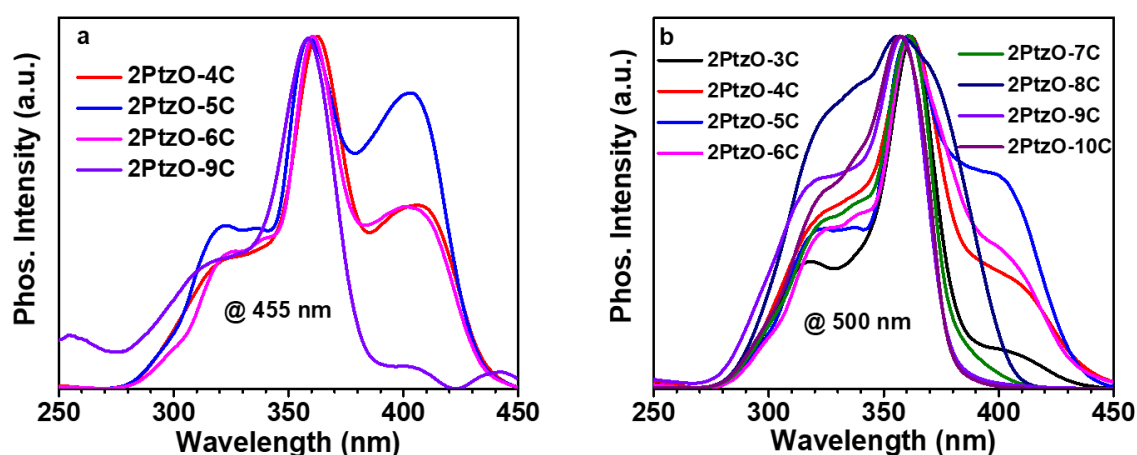

**Fig. S7** **a** The excitation spectra of **2PtzO-nC** in crystal state for the phosphorescence band at 445 nm and **b** at 500 nm.

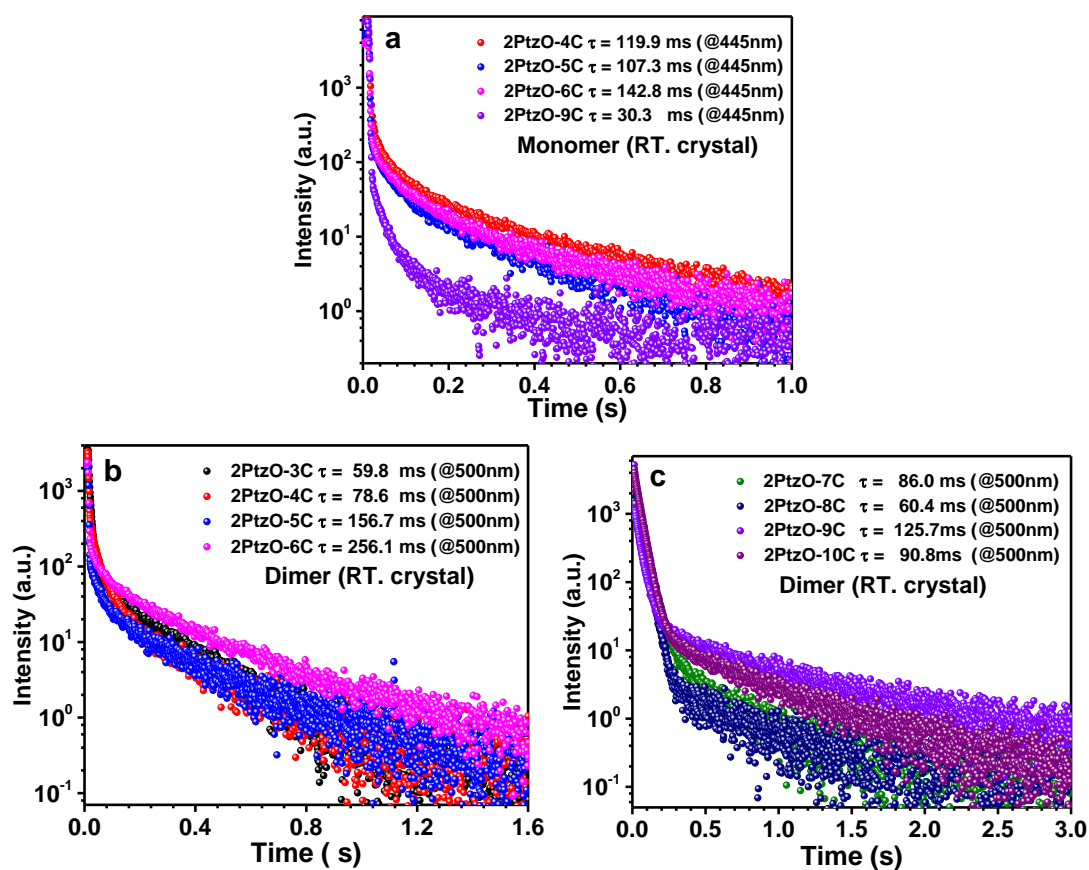

**Fig. S8 a** Time-resolved RTP-decay curves of **2PtzO-nC** crystals at 445 nm ( $\lambda_{\text{ex}} = 365$  nm; monomer phosphorescence). **b** Time-resolved RTP-decay curves of **2PtzO-nC** ( $n = 3-6$ ) crystals at 500 nm ( $\lambda_{\text{ex}} = 365$  nm; dimer phosphorescence). **c** Time-resolved RTP-decay curves of **2PtzO-nC** ( $n = 7-10$ ) crystals at 500 nm ( $\lambda_{\text{ex}} = 365$  nm; dimer phosphorescence).

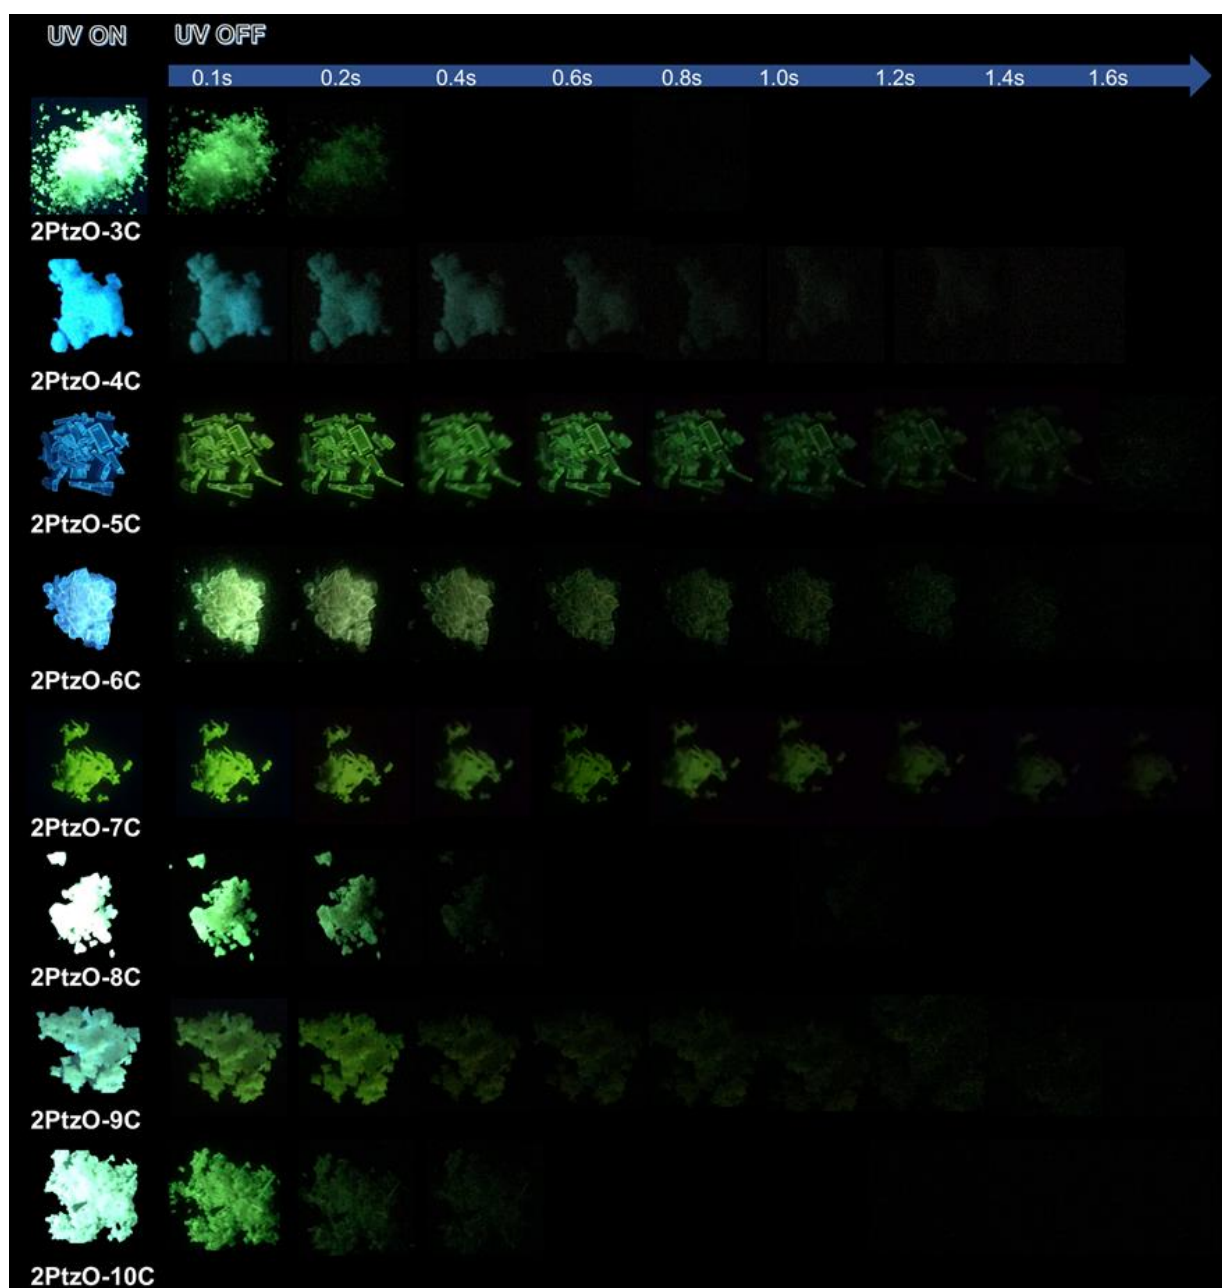

**Fig. S9** Photographs of **2PtzO-nC** crystals taken at different times before and after removing the excitation of a 365 nm UV lamp.



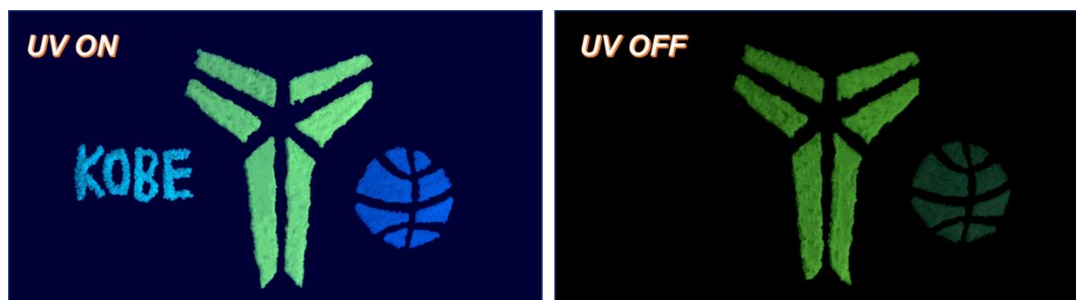

**Fig. S10** Application of multiple anti-counterfeiting: the name of “KOBE” was written by pyrene—a conventional dimer fluorescent material; “Mamba” logo was written by **2PtzO-7C** powder—pure dimer phosphorescence material and “basketball” written by **2PtzO-6C** powder—dual phosphorescence emissions material (left: under 365 nm UV lamp; right: after the removal of 365 nm UV excitation). A very meaningful moral: Kobe is dead, but Mamba Mentality and basketball faith are forever.

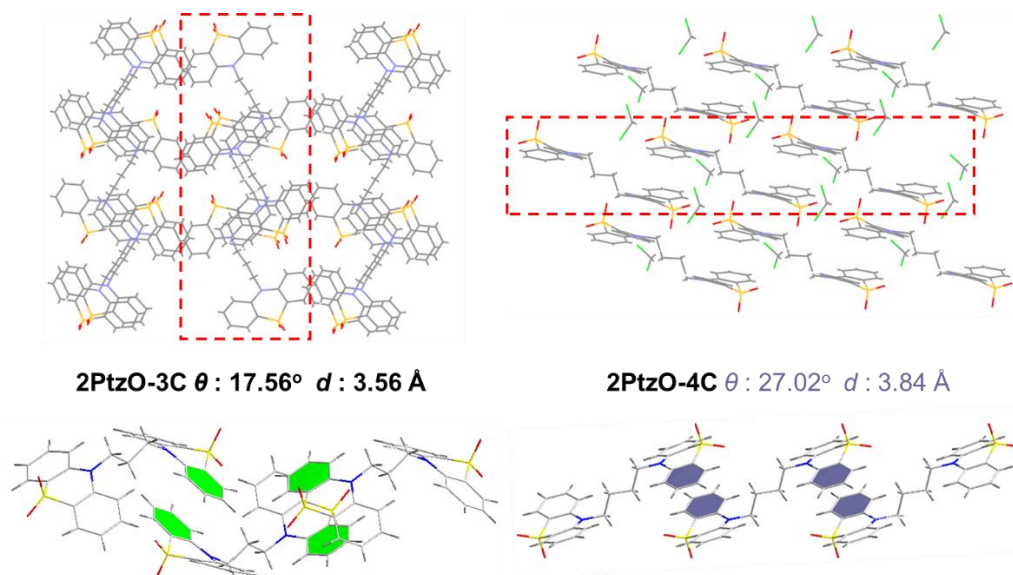

**Fig. S11** Entire and local packing modes of **2PtzO-3C** and **2PtzO-4C**. Phenyl rings involved in the stronger  $\pi$ - $\pi$  interaction is labeled by green color and weaker  $\pi$ - $\pi$  interaction by indigo blue color. ( $d$ : vertical distance between the adjacent benzene planes;  $\theta$ : displacement angle, the angle between the centroid-centroid line and the vertical line)

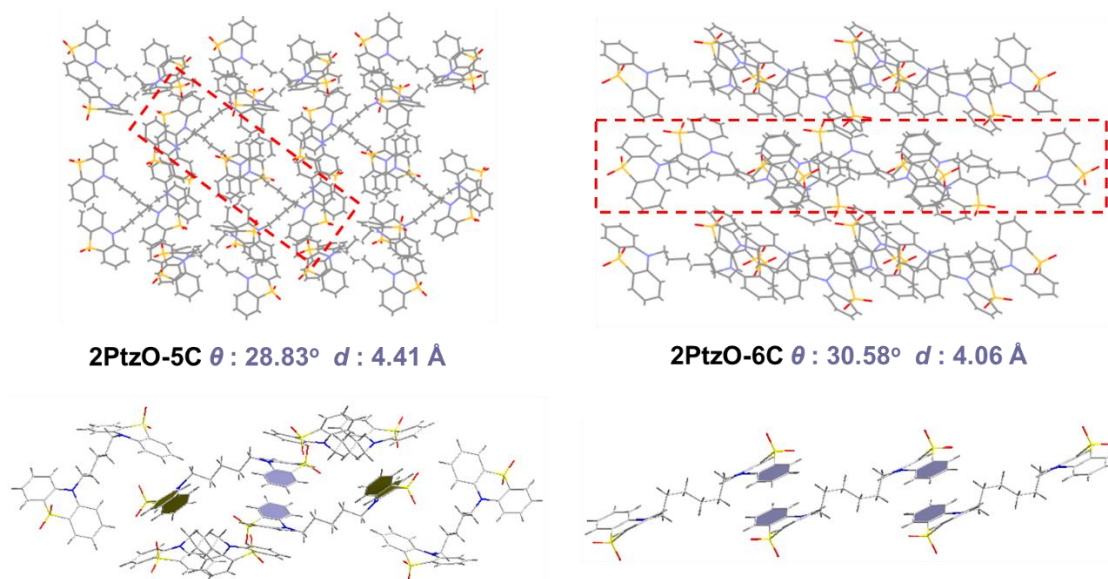

**Fig. S12** Entire and local packing modes of **2PtzO-5C** and **2PtzO-6C**. Phenyl rings involved in weak  $\pi$ - $\pi$  interaction is labeled by indigo blue color. ( $d$ : vertical distance between the adjacent benzene planes;  $\theta$ : displacement angle, the angle between the centroid-centroid line and the vertical line)

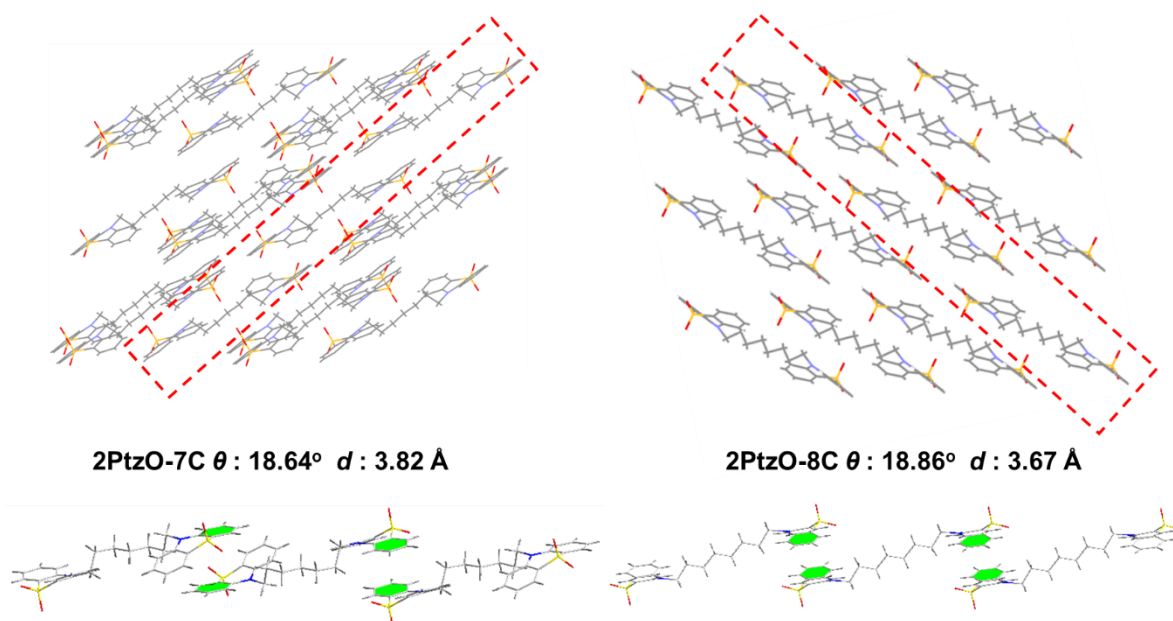

**Fig. S13** Entire and local packing modes of **2PtzO-7C** and **2PtzO-8C**. Phenyl rings involved in the strong  $\pi$ - $\pi$  interaction is labeled by green color. ( $d$ : vertical distance between the adjacent benzene planes;  $\theta$ : displacement angle, the angle between the centroid-centroid line and the vertical line)

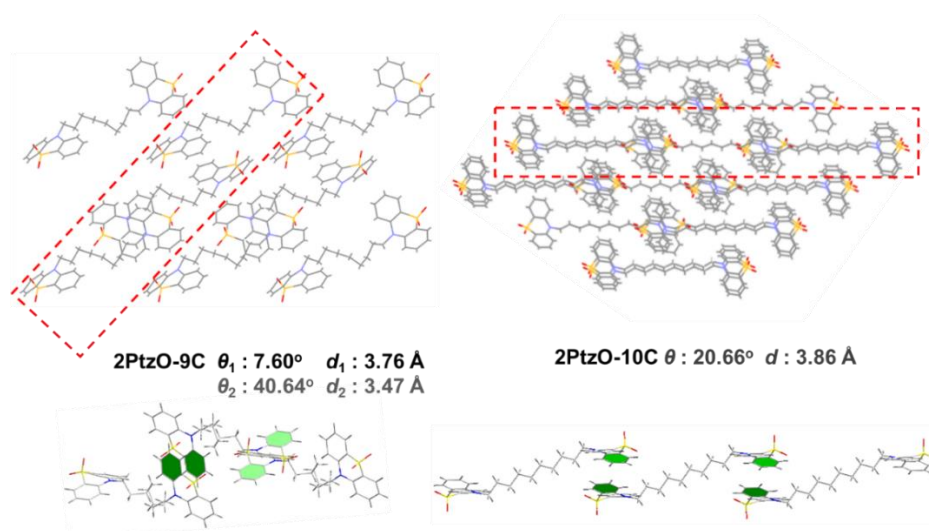

**Fig. S14** Entire and local packing modes of **2PtzO-9C** and **2PtzO-10C**. Phenyl rings involved in the strong  $\pi$ - $\pi$  interaction is labeled by green color. ( $d$ : vertical distance between the adjacent benzene planes;  $\theta$ : displacement angle, the angle between the centroid-centroid line and the vertical line)

**Table S3** Structure data of single crystals of **2PtzO-nC** ( $n = 3-6$ ).

| Name                                 | <b>2PtzO-3C</b>                                                              | <b>2PtzO-4C</b>                                                              | <b>2PtzO-5C</b>                                                              | <b>2PtzO-6C</b>                                                              |
|--------------------------------------|------------------------------------------------------------------------------|------------------------------------------------------------------------------|------------------------------------------------------------------------------|------------------------------------------------------------------------------|
| Formula                              | C <sub>27</sub> H <sub>22</sub> N <sub>2</sub> O <sub>4</sub> S <sub>2</sub> | C <sub>28</sub> H <sub>24</sub> N <sub>2</sub> O <sub>4</sub> S <sub>2</sub> | C <sub>29</sub> H <sub>26</sub> N <sub>2</sub> O <sub>4</sub> S <sub>2</sub> | C <sub>30</sub> H <sub>28</sub> N <sub>2</sub> O <sub>4</sub> S <sub>2</sub> |
| Wavelength(Å)                        | 1.54184                                                                      | 1.54184                                                                      | 1.54184                                                                      | 1.54184                                                                      |
| Space Group                          | P b c n                                                                      | C c                                                                          | P b c a                                                                      | P 21/c                                                                       |
| Cell Lengths (Å)                     | a=20.2922(2)<br>b=7.95270(10)<br>c=14.2127(10)                               | a=9.6965(3)<br>b=13.3896(4)<br>c=21.1235(6)                                  | a=16.3020(10)<br>b=11.8701(10)<br>c=26.1081(10)                              | a=11.6438(2)<br>b=15.2057(2)<br>c=14.6760(3)                                 |
| Cell Angles (°)                      | $\alpha$ =90<br>$\beta$ =90<br>$\gamma$ =90                                  | $\alpha$ =90<br>$\beta$ =101.429(3)<br>$\gamma$ =90                          | $\alpha$ =90<br>$\beta$ =90<br>$\gamma$ =90                                  | $\alpha$ =90<br>$\beta$ =90.012(2)<br>$\gamma$ =90                           |
| Cell Volume (Å <sup>3</sup> )        | 2293.61(4)                                                                   | 2688.12(14)                                                                  | 5052.08(6)                                                                   | 2598.42(8)                                                                   |
| Z                                    | 4                                                                            | 4                                                                            | 8                                                                            | 4                                                                            |
| Density (g/cm <sup>3</sup> )         | 1.456                                                                        | 1.486                                                                        | 1.395                                                                        | 1.392                                                                        |
| F (000)                              | 1048                                                                         | 1248                                                                         | 2224                                                                         | 1144                                                                         |
| $h_{\max}$ , $k_{\max}$ , $l_{\max}$ | 24,9,16                                                                      | 11,15,25                                                                     | 20,14,32                                                                     | 13,18,17                                                                     |
| CCDC Number                          | 2088011                                                                      | 2088093                                                                      | 2088010                                                                      | 2088094                                                                      |

**Table S4** Structure data of single crystals of **2PtzO-nC** (n = 7-10).

| Name                                                   | <b>2PtzO-7C</b>                                                              | <b>2PtzO-8C</b>                                                              | <b>2PtzO-9C</b>                                                              | <b>2PtzO-10C</b>                                                             |
|--------------------------------------------------------|------------------------------------------------------------------------------|------------------------------------------------------------------------------|------------------------------------------------------------------------------|------------------------------------------------------------------------------|
| Formula                                                | C <sub>31</sub> H <sub>30</sub> N <sub>2</sub> O <sub>4</sub> S <sub>2</sub> | C <sub>32</sub> H <sub>32</sub> N <sub>2</sub> O <sub>4</sub> S <sub>2</sub> | C <sub>33</sub> H <sub>34</sub> N <sub>2</sub> O <sub>4</sub> S <sub>2</sub> | C <sub>34</sub> H <sub>36</sub> N <sub>2</sub> O <sub>4</sub> S <sub>2</sub> |
| Wavelength(Å)                                          | 1.54184                                                                      | 1.54184                                                                      | 1.54184                                                                      | 1.54184                                                                      |
| Space Group                                            | C 2/c                                                                        | P -1                                                                         | P -1                                                                         | I 2/a                                                                        |
| Cell Lengths (Å)                                       | a=18.5127(2)<br>b=9.29390(10)<br>c=15.3722(2)                                | a=7.7745(5)<br>b=9.2795(5)<br>c=10.3305(7)                                   | a=8.6717(2)<br>b=12.3273(6)<br>c=13.6657(7)                                  | a=16.6374(5)<br>b=10.0062(3)<br>c=19.6938(6)                                 |
| Cell Angles (°)                                        | α=90<br>β=98.7040(10)<br>γ=90                                                | α=110.901(6)<br>β=95.509(6)<br>γ=98.111(5)                                   | α=90.840(4)<br>β=103.087(3)<br>γ=92.202(3)                                   | α=90<br>β=109.222(4)<br>γ=90                                                 |
| Cell Volume (Å <sup>3</sup> )                          | 2614.41(5)                                                                   | 680.59(8)                                                                    | 1421.44(11)                                                                  | 3095.79(18)                                                                  |
| Z                                                      | 4                                                                            | 1                                                                            | 2                                                                            | 4                                                                            |
| Density (g/cm <sup>3</sup> )                           | 1.419                                                                        | 1.397                                                                        | 1.371                                                                        | 1.289                                                                        |
| F (000)                                                | 1176                                                                         | 302.0                                                                        | 620.0                                                                        | 1272                                                                         |
| h <sub>max</sub> , k <sub>max</sub> , l <sub>max</sub> | 22,11,18                                                                     | 9,11,12                                                                      | 10,15,16                                                                     | 19,11,23                                                                     |
| CCDC Number                                            | 2088095                                                                      | 2088096                                                                      | 2088097                                                                      | 2088098                                                                      |

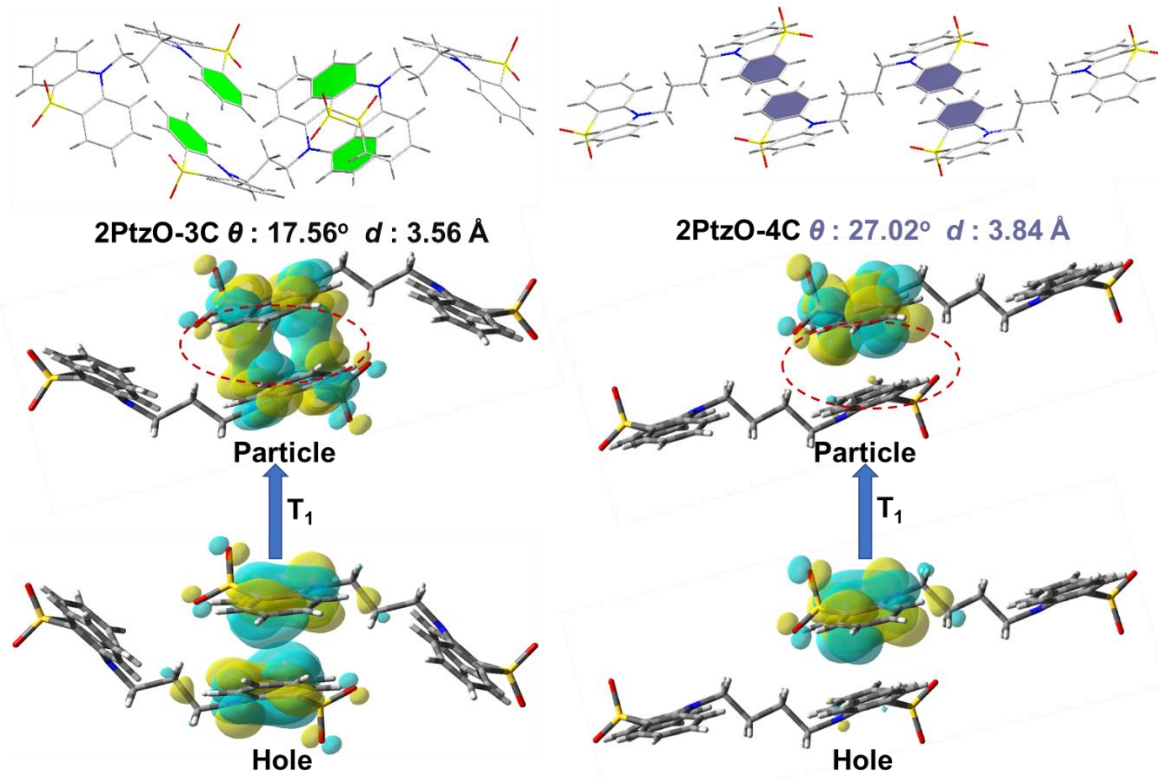

**Fig. S15** Natural transition orbitals (NTOs) of the  $T_1$  state for the dimers of **2PtzO-3C** and **2PtzO-4C**. (The tighter the  $\pi$ - $\pi$  stacking, the stronger the orbital coupling in  $T_1$  state).

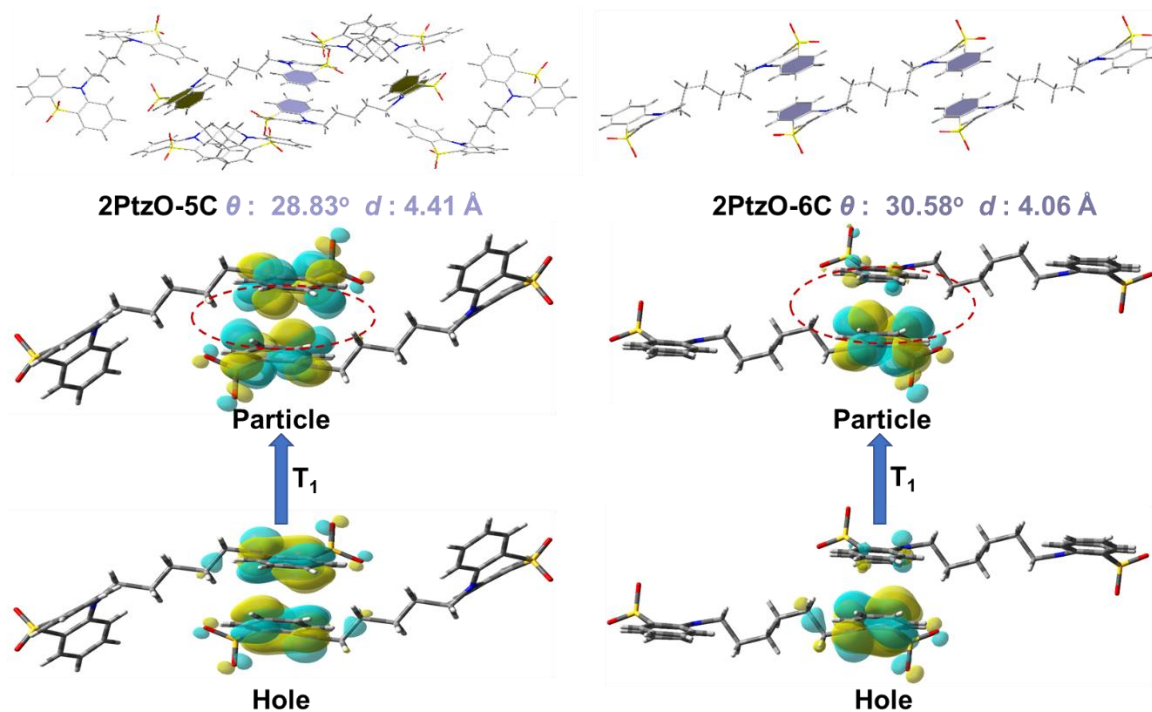

**Fig. S16** Natural transition orbitals (NTOs) of  $T_1$  state for the dimers of **2PtzO-5C** and **2PtzO-6C**. (The tighter the  $\pi$ - $\pi$  stacking, the stronger the orbital coupling in  $T_1$  state).



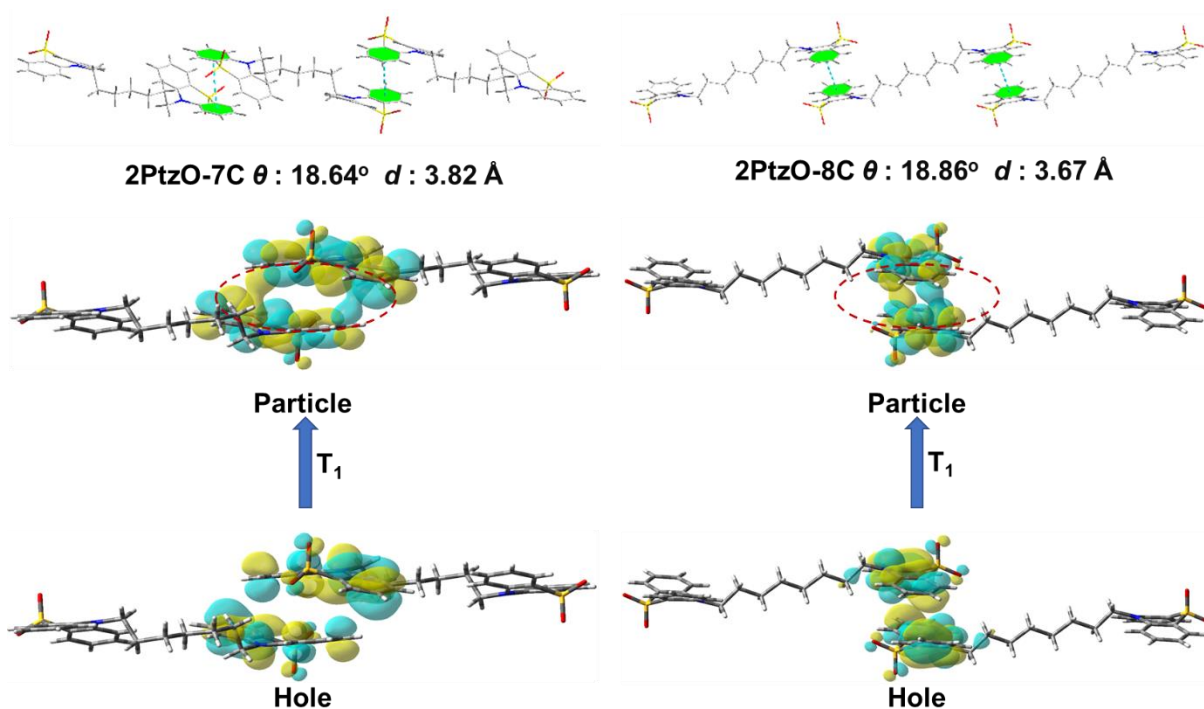

**Fig. S17** Natural transition orbitals (NTOs) of  $T_1$  state for the dimers of **2PtzO-7C** and **2PtzO-8C**. (The tighter the  $\pi$ - $\pi$  stacking, the stronger the orbital coupling in  $T_1$  state).

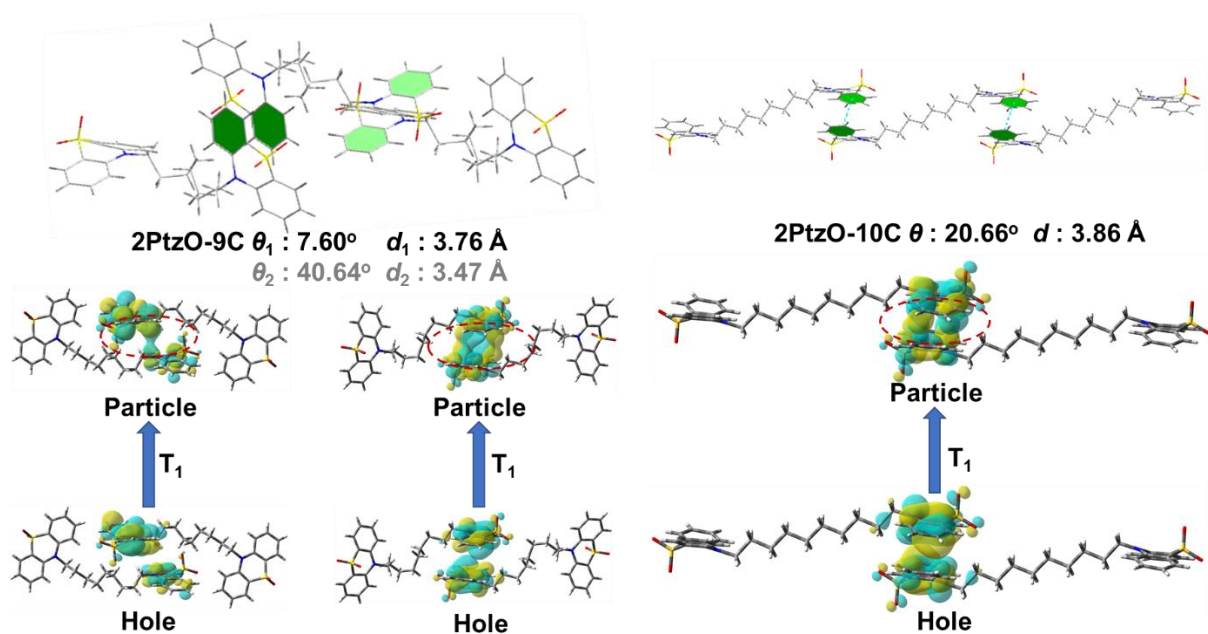

**Fig. S18** Natural transition orbitals (NTOs) of  $T_1$  state for the dimers of **2PtzO-9C** and **2PtzO-10C**. (The tighter the  $\pi$ - $\pi$  stacking, the stronger the orbital coupling in  $T_1$  state).

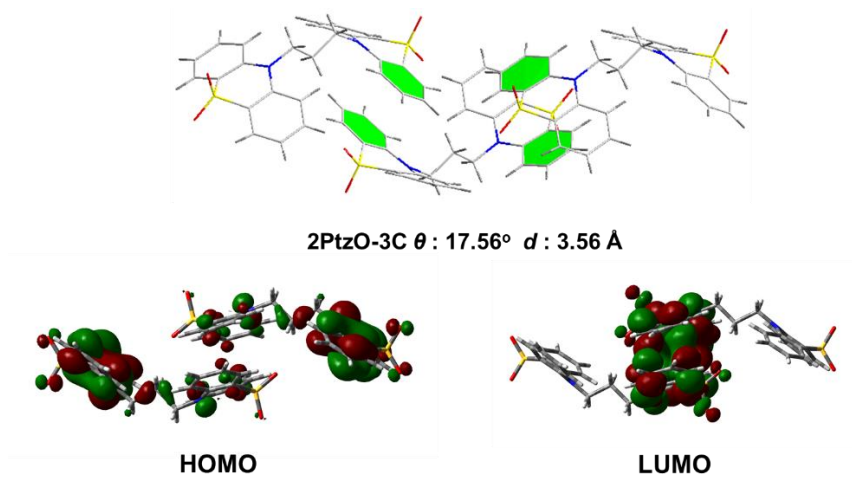

Fig. S19 The HOMO, LUMO orbital distributions for the dimer unit of 2PtzO-3C.

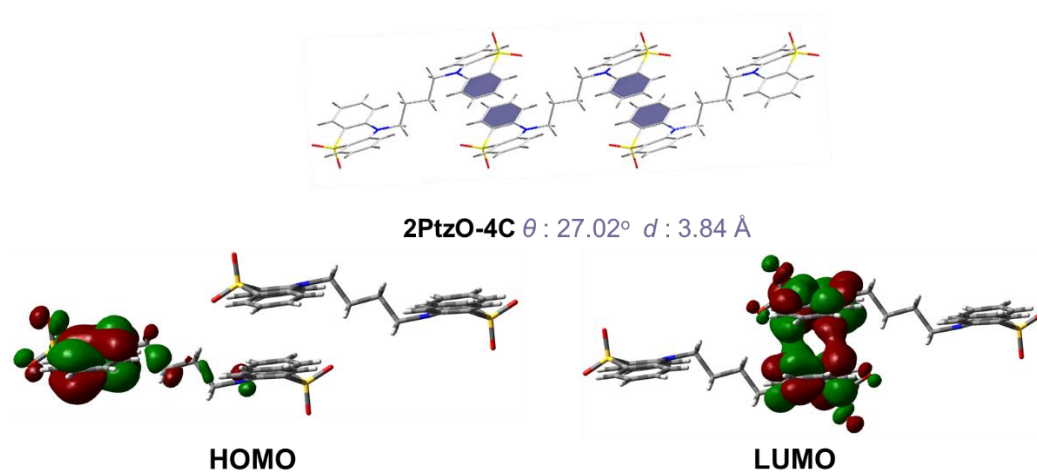

Fig. S20 The HOMO, LUMO orbital distributions for the dimer unit of 2PtzO-4C.

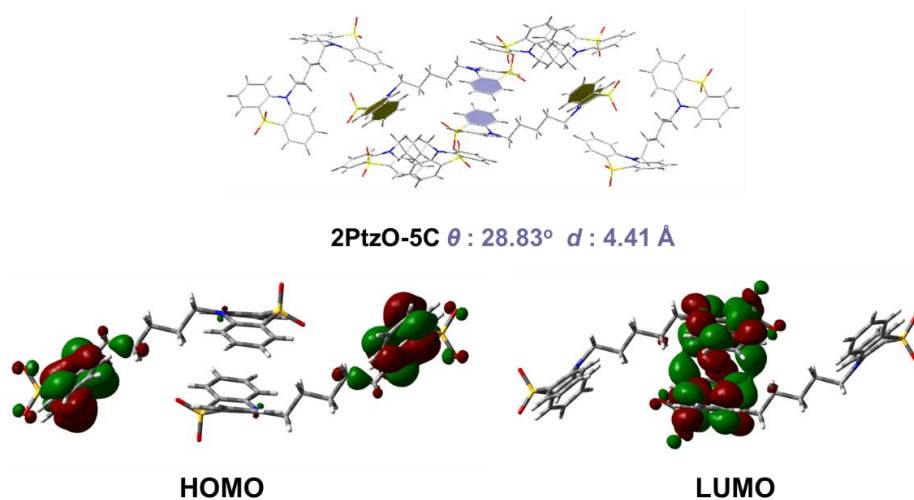

Fig. S21 The HOMO, LUMO orbital distributions for the dimer unit of 2PtzO-5C.

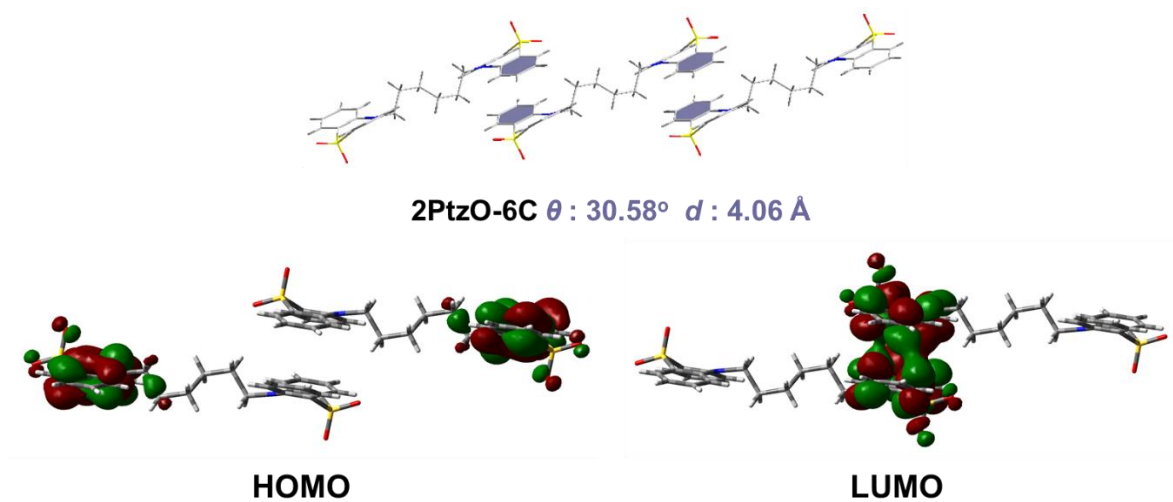

Fig. S22 The HOMO, LUMO orbital distributions for the dimer unit of **2PtzO-6C**.

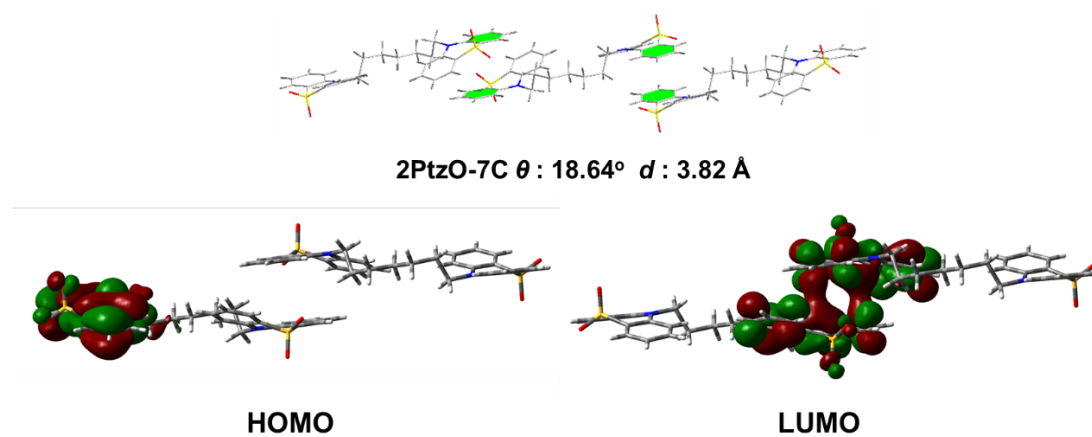

Fig. S23 The HOMO, LUMO orbital distributions for the dimer unit of **2PtzO-7C**.

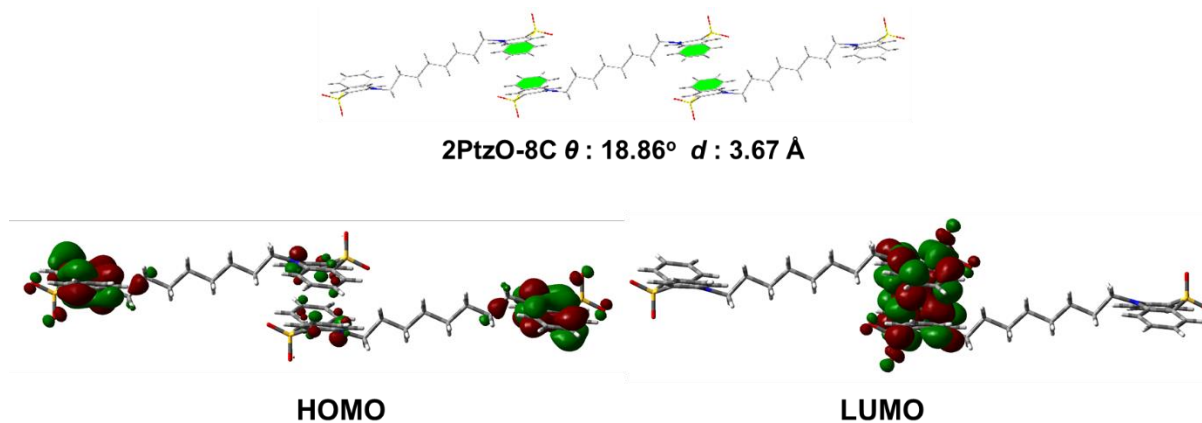

Fig. S24 The HOMO, LUMO orbital distributions for the dimer unit of **2PtzO-8C**.



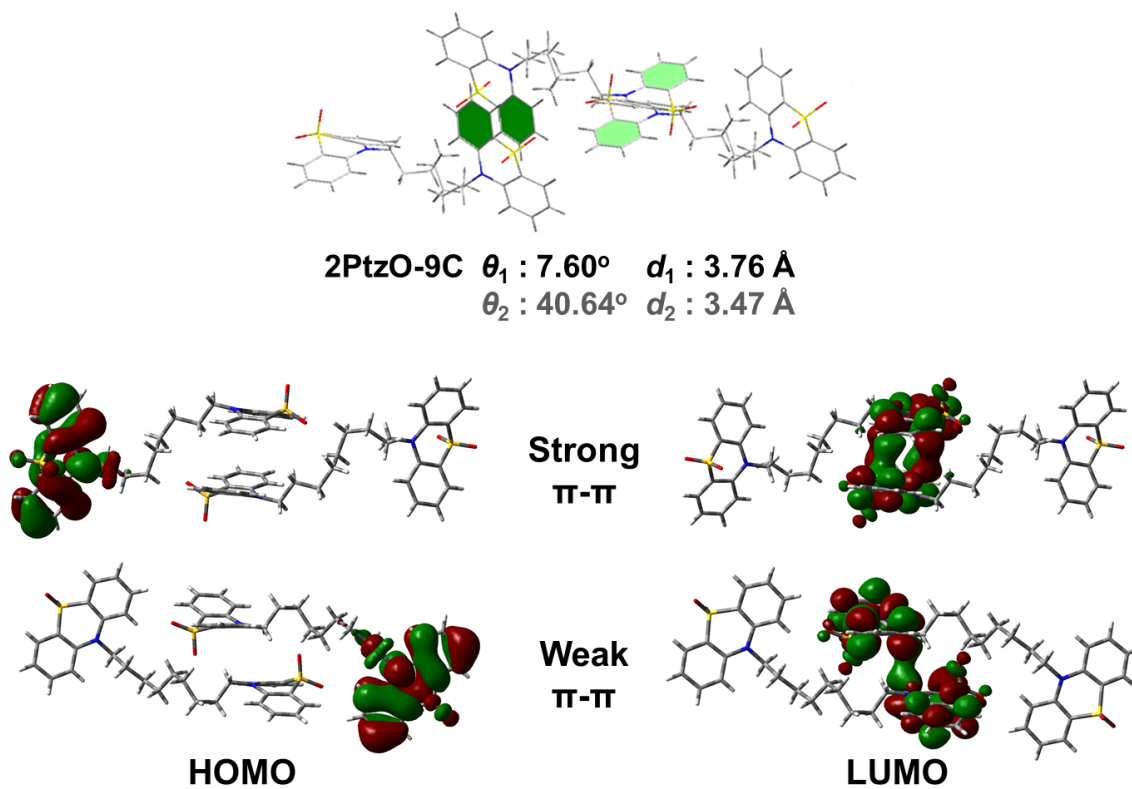

**Fig. S25** The HOMO, LUMO orbital distributions for the dimer units of **2PtzO-9C**.

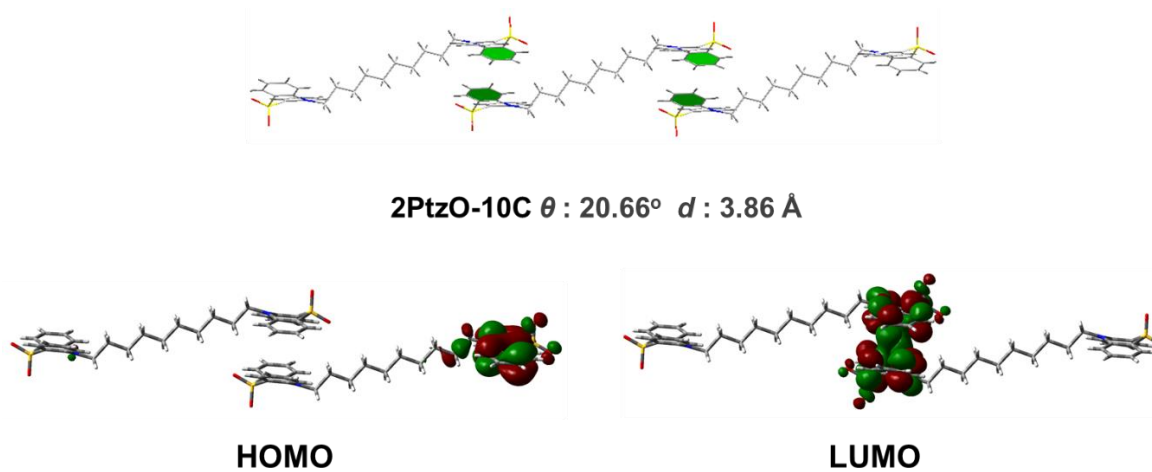

**Fig. S26** The HOMO, LUMO orbital distributions for the dimer unit of **2PtzO-10C**.

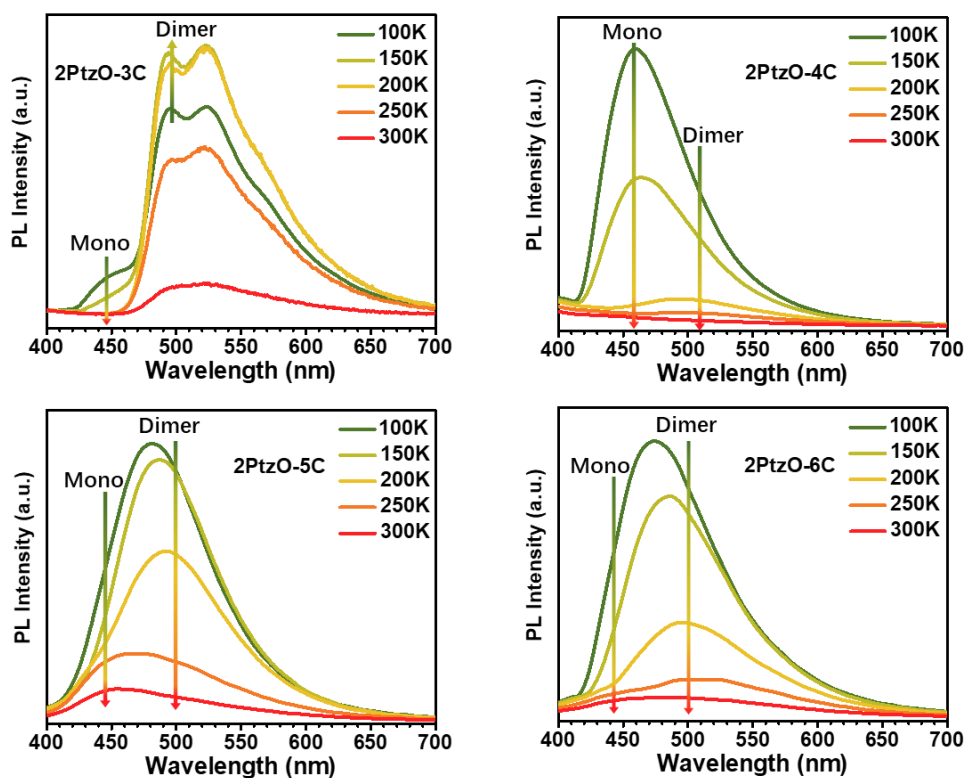

Fig. S27 The PL spectra of 2PtzO-nC (n = 3-6) crystals at different temperatures.

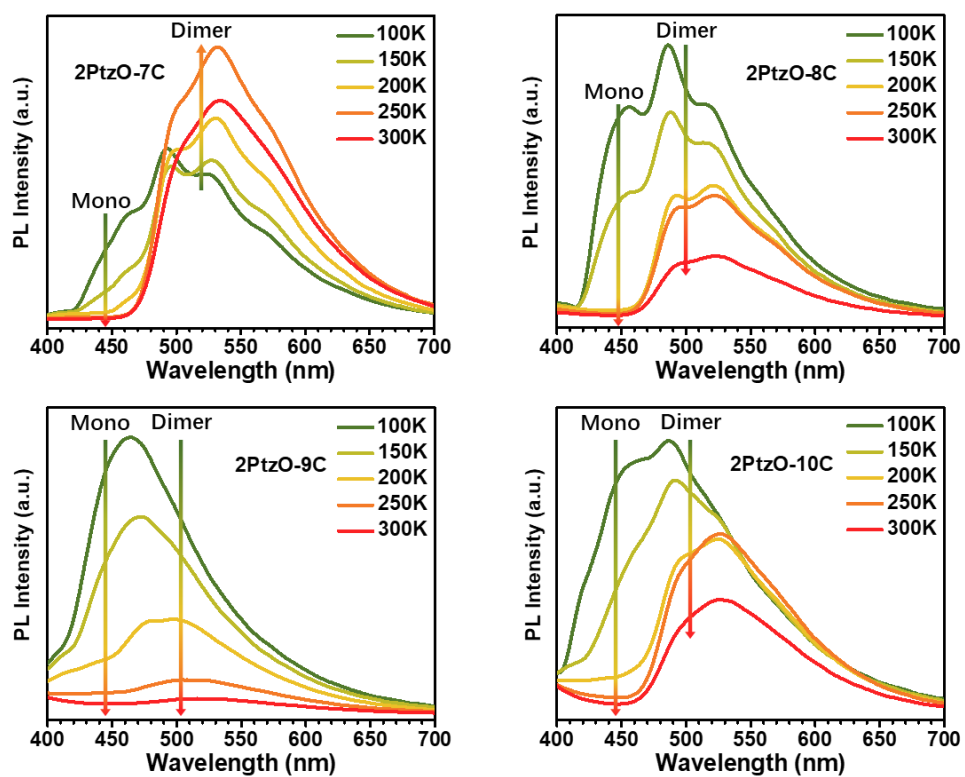

Fig. S28 The PL spectra of 2PtzO-nC (n = 7-10) crystals at different temperatures.

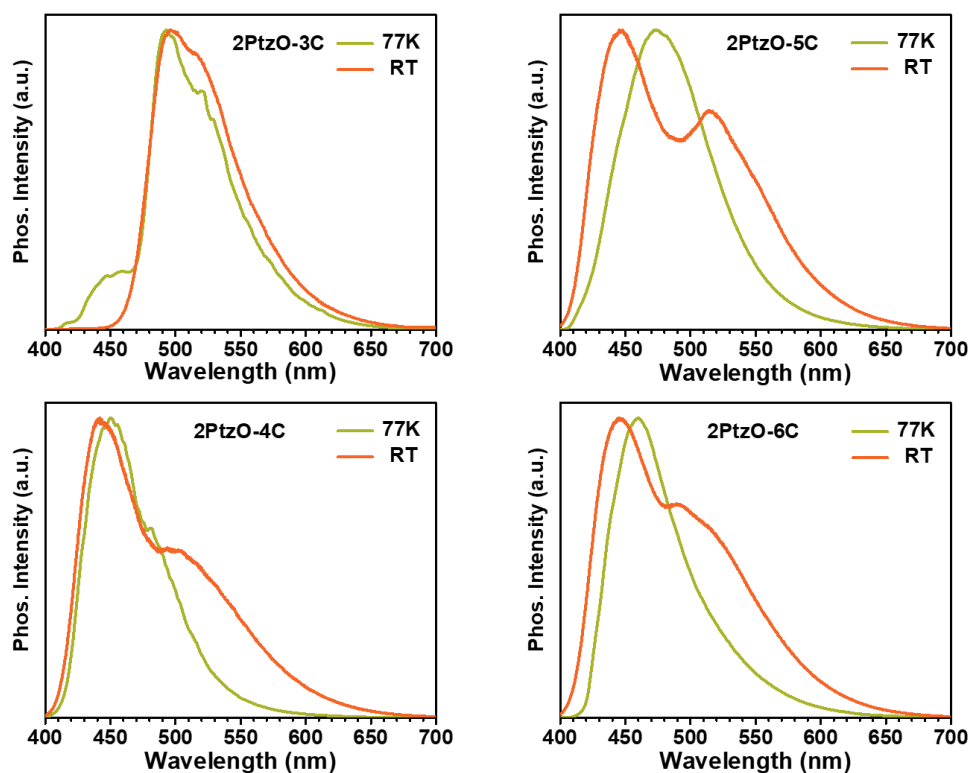

**Fig. S29** The normalized phosphorescence spectra of **2PtzO-nC** ( $n = 3-6$ ) crystals at room temperature and 77 K.

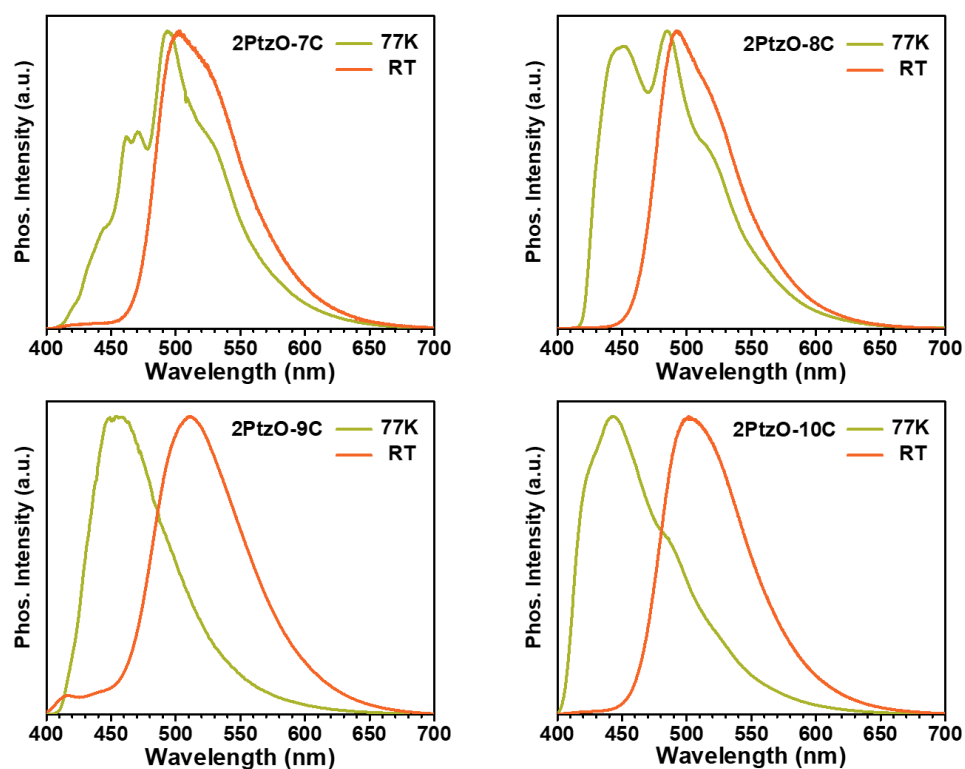

**Fig. S30** The normalized phosphorescence spectra of **2PtzO-nC** ( $n = 7-10$ ) crystals at room temperature and 77 K.

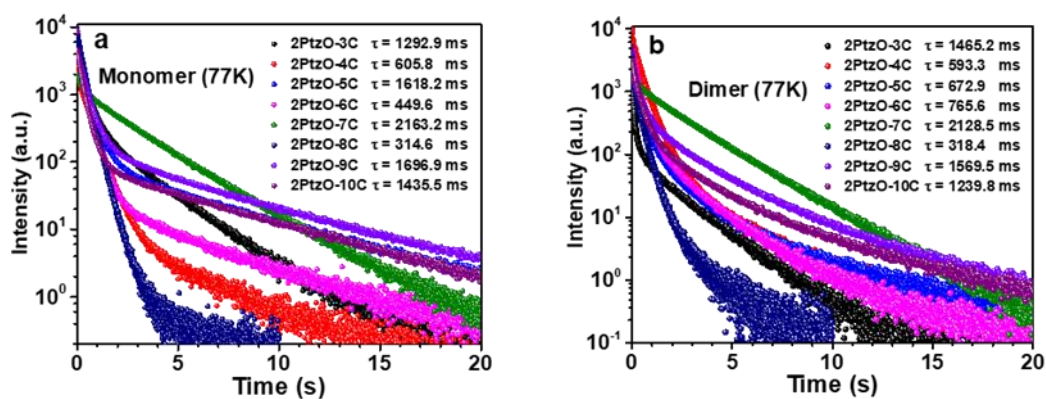

**Fig. S31** **a** Time-resolved PL-decay curves for monomer phosphorescence (@445 nm) of **2PtzO-nC** crystals at 77 K. **b** Time-resolved PL-decay curves for dimer phosphorescence (@500 nm) of **2PtzO-nC** crystals at 77 K.

**Table S5** The phosphorescence intensity and ratio of dimer to monomer for **2PtzO-nC** ( $n = 3-6$ ) crystals at 77 K and room temperature.

|              | <b>2PtzO-3C</b> |        | <b>2PtzO-4C</b> |       | <b>2PtzO-5C</b> |       | <b>2PtzO-6C</b> |       |
|--------------|-----------------|--------|-----------------|-------|-----------------|-------|-----------------|-------|
|              | 77 K            | RT     | 77 K            | RT    | 77 K            | RT    | 77 K            | RT    |
| $I_M$ (a.u.) | 0.176           | 0.007  | 1.000           | 1.000 | 0.739           | 1.000 | 0.824           | 1.000 |
| $I_D$ (a.u.) | 1.000           | 1.000  | 0.302           | 0.537 | 0.438           | 0.714 | 0.402           | 0.683 |
| $I_D / I_M$  | 5.44            | 141.41 | 0.30            | 0.54  | 0.59            | 0.71  | 0.49            | 0.68  |

$I_M$  = Phosphorescence intensity of monomer at about 445 nm in normalized phosphorescence spectra  
 $I_D$  = Phosphorescence intensity of dimer at about 500 nm in normalized phosphorescence spectra

**Table S6** The phosphorescence intensity and ratio of dimer to monomer for **2PtzO-nC** ( $n = 7-10$ ) crystals at 77 K and room temperature.

|              | <b>2PtzO-7C</b> |       | <b>2PtzO-8C</b> |        | <b>2PtzO-9C</b> |       | <b>2PtzO-10C</b> |       |
|--------------|-----------------|-------|-----------------|--------|-----------------|-------|------------------|-------|
|              | 77 K            | RT    | 77 K            | RT     | 77 K            | RT    | 77 K             | RT    |
| $I_M$ (a.u.) | 0.345           | 0.019 | 0.940           | 0.003  | 1.000           | 0.082 | 1.000            | 0.023 |
| $I_D$ (a.u.) | 1.000           | 1.000 | 1.000           | 1.000  | 0.384           | 1.000 | 0.762            | 1.000 |
| $I_D / I_M$  | 2.90            | 52.63 | 1.06            | 333.34 | 0.38            | 12.20 | 0.76             | 43.48 |

$I_M$  = Phosphorescence intensity of monomer at about 445 nm in normalized phosphorescence spectra  
 $I_D$  = Phosphorescence intensity of dimer at about 500 nm in normalized phosphorescence spectra

**Notes:** The CCDC Numbers for **2PtzO-nC** (n = 3-10) crystals are 2088011, 2088093, 2088010, 2088094, 2088095, 2088096, 2088097 and 2088098 respectively, and the Cif files for these crystals could be downloaded on the website of The Cambridge Crystallographic Data Centre (CCDC) (<https://ccdc.cam.ac.uk/>).
