# Supplementary material for: Direct demonstration of triplet excimer in purely organic room temperature phosphorescence through rational molecular design
Source: PubMed Central journal article supplement (PMC9114335; doi:10.1038/s41377-022-00826-4), 2022-05-17
Supplement: 41377_2022_826_MOESM4_ESM.pdf [file 41377_2022_826_MOESM4_ESM.pdf]

**The influence of the molecular packing on the room temperature phosphorescence of purely organic luminogens**

**SPRINGER NATURE**

**Author:** Jie Yang et al

**Publication:** Nature Communications

**Publisher:** Springer Nature

**Date:** Feb 26, 2018

*Copyright © 2018, The Author(s)*

**Creative Commons**

This is an open access article distributed under the terms of the [Creative Commons CC BY](#) license, which permits unrestricted use, distribution, and reproduction in any medium, provided the original work is properly cited.

You are not required to obtain permission to reuse this article.

To request permission for a type of use not listed, please contact [Springer Nature](#)
